# Supplementary material
Source: PubMed Central journal article supplement (PMC5217782)
Supplement: 10.1074_M116.061028_mcp.M116.061028-1.pdf [file 10.1074_M116.061028_mcp.M116.061028-1.pdf]

**Human spermatozoa quantitative proteomic signature classifies normo- and asthenozoospermia**

**Mayank Saraswat, Sakari Joenvaara, Tushar Jain, Anil Kumar Tomar, Ashima Sinha, Sarman Singh, Savita Yadav, Risto Renkonen**

**Supplementary Table 1 and Figures**

**Supplementary Table 1:** Metadata for samples included in the study. Coded sample names, disease categorization, sperm count and sperm motility in percentage is given in the table. Which sperm and seminal plasma samples were used in the study are also indicated in separate columns.

| Sample Name | Disease class     | Sperm | Seminal plasma | Sperm Count million/mL | Sperm Motility (% Motile sperm) |
|-------------|-------------------|-------|----------------|------------------------|---------------------------------|
| N2          | Normal            | x     | x              | 160                    | 60                              |
| N3          | Normal            | x     | x              | 116                    | 50                              |
| N11         | Normal            | x     | x              | 102                    | 55                              |
| N12         | Normal            | x     | x              | 78                     | 50                              |
| N13         | Normal            | x     | x              | 60                     | 55                              |
| N21         | Normal            | N/A   | x              | 86                     | 50                              |
| N22         | Normal            | N/A   | x              | 185                    | 60                              |
| A1          | Asthenozoospermia | X     | x              | 224                    | 10                              |
| A2          | Asthenozoospermia | X     | x              | 60                     | 20                              |
| A3          | Asthenozoospermia | X     | x              | 50                     | 0                               |
| A4          | Asthenozoospermia | N/A   | x              | 2                      | 0                               |
| A5          | Asthenozoospermia | X     | x              | 70                     | 0                               |
| A12         | Asthenozoospermia | X     | x              | 55                     | 30                              |
| A13         | Asthenozoospermia | X     | x              | 78                     | 30                              |
| A21         | Asthenozoospermia | X     | x              | 160                    | 0                               |
| A22         | Asthenozoospermia | N/A   | x              | 105                    | 10                              |
| A23         | Asthenozoospermia | X     | x              | 72                     | 10                              |

## Supplementary Figures:

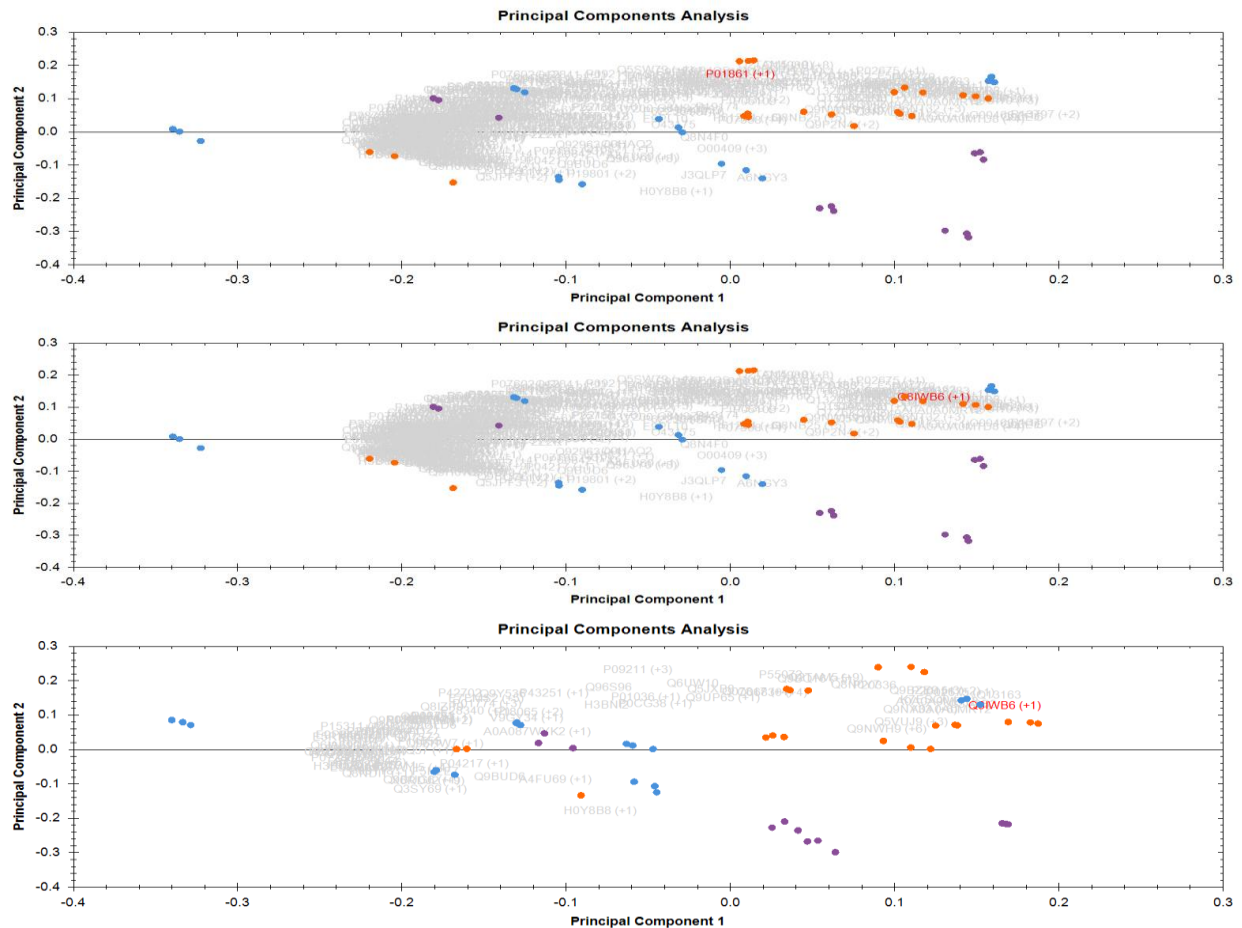

**Supplementary Figure 1:** Human seminal plasma motility classes PCA: Purple dots are samples having 0% sperm motility, blue dots are samples having 10-30% sperm motility and orange dots are samples having 50-60% sperm motility. Upper panel is the PCA when all the proteins quantitated were considered for the PCA, middle panel is when only housekeeping proteins (FC 1.0 to 1.29) were considered for PCA. Lower panel is when only the proteins having Anova p value less than 0.05 and fold change more than 2 in either condition were considered for PCA.

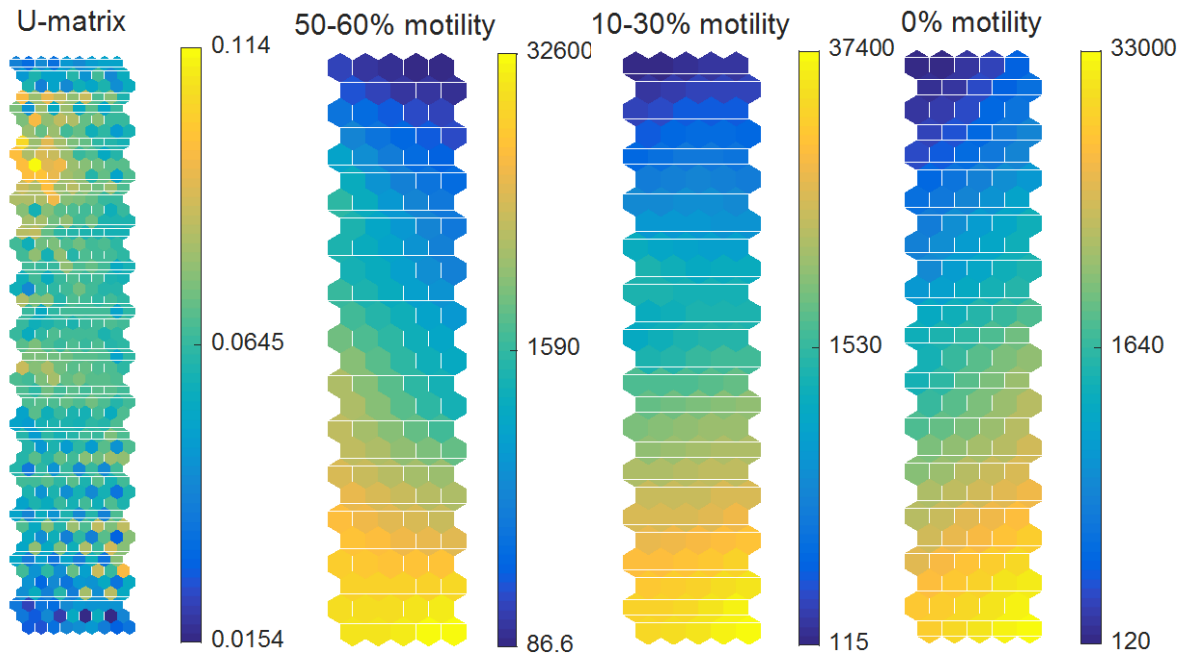

**Supplementary Figure 2:** Sperm proteomic dataset SOM analysis; The first matrix in the figure is the U-matrix calculated based on all the variables and then the component planes. Unified distance matrix (U-matrix) visualizes distances between neighboring map units, and shows the cluster structure of the map: High values of the U-matrix indicate a cluster border, uniform areas of low values indicate cluster themselves. Each component planes shows the values of one variable in each map unit.

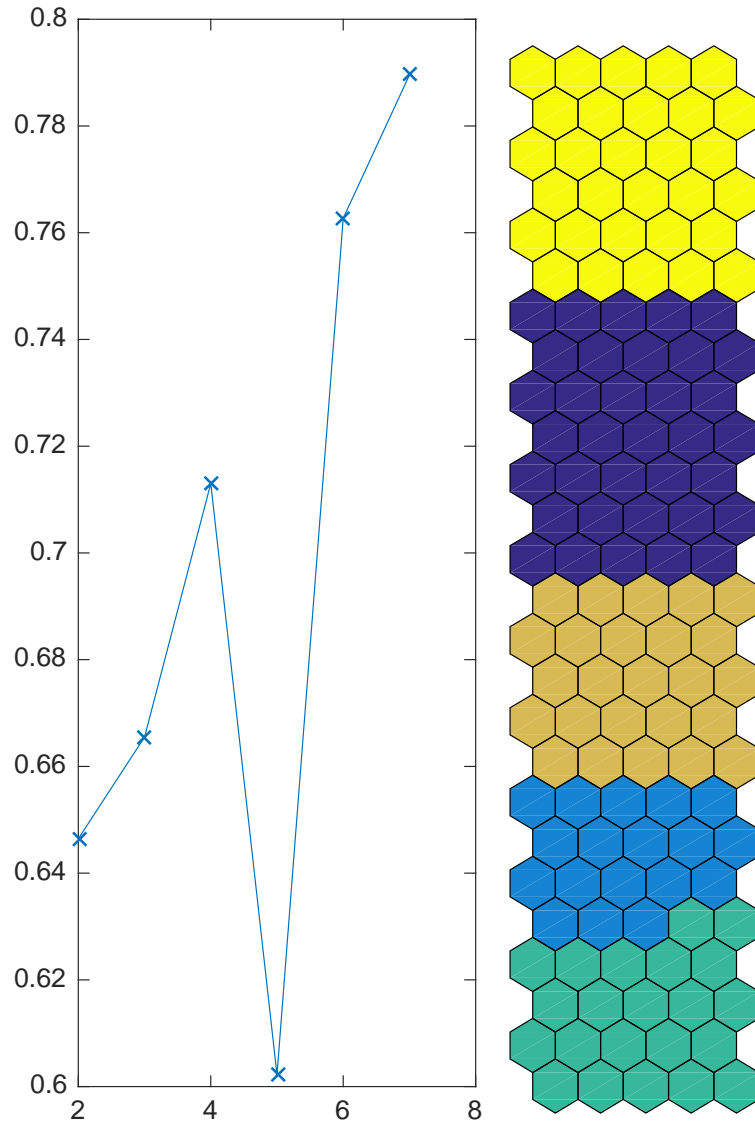

**Supplementary Figure 3:** Sperm proteomic dataset SOM analysis; It illustrates the Davies-Boulding index which indicates that there are five clusters formed in SOM analysis. The clusters on the map are also shown. This cluster information enabled the respective cluster feature extraction.
